# Supplementary material for: Divergence of climbing escape flight performance in Morpho butterflies living in different microhabitats
Source: J Exp Biol. 2022 Aug 2;225(15):jeb243867. doi: 10.1242/jeb.243867 (PMC9440751; doi:10.1242/jeb.243867)
Supplement: Supplementary information [file jexbio-225-243867-s1.pdf]

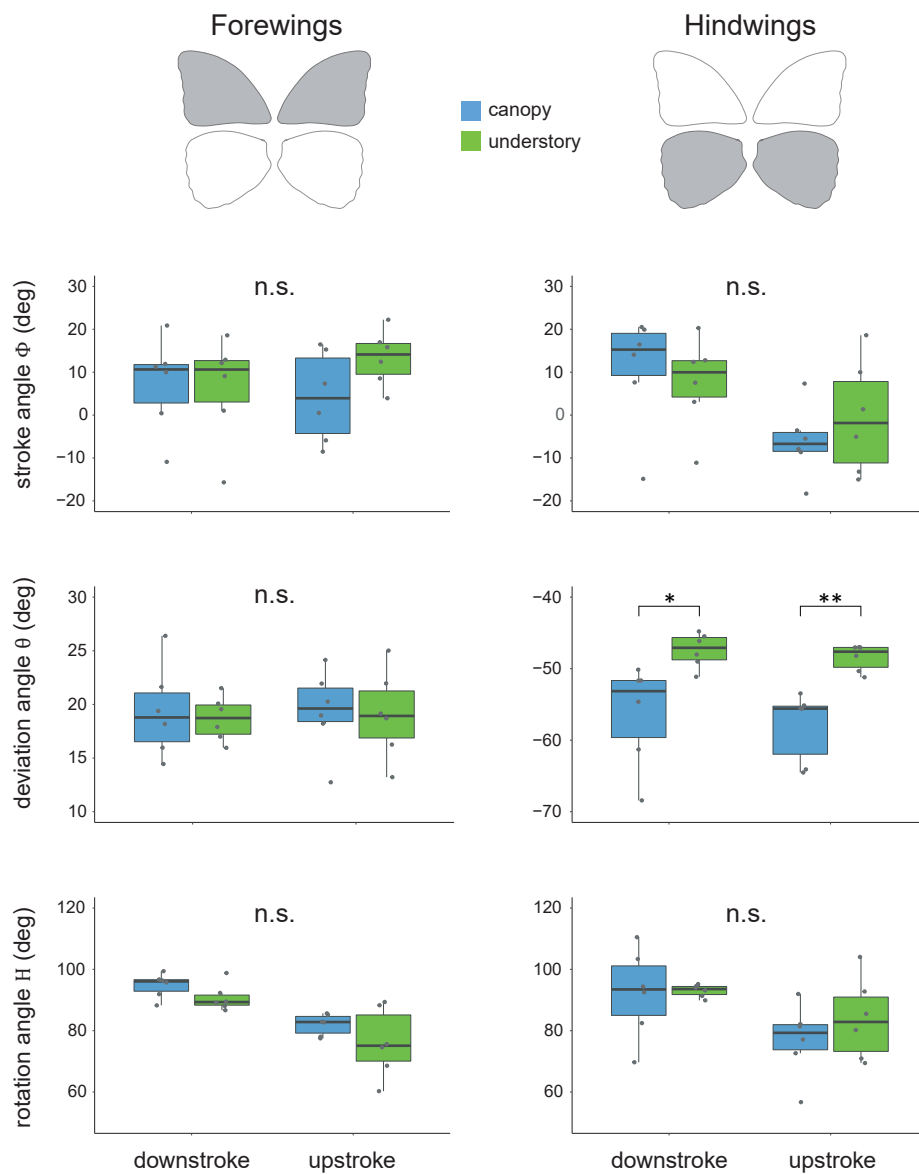

**Fig. S2. Variation in mean values of wing angles among microhabitats.** Mean values of wing angle were measured separately one the forewings (left column) and the hindwings (right column) using the averaged value of left and right wings for each wing pair. For each wing pair, the mean value of wing angle was moreover measured separately in the down- and upstroke phase (left and right respectively within each panel). Statistical difference between canopy and understory were tested using ANOVAs (\* $p < 0.05$ ; \*\* $p < 0.01$ ; n.s.= not significant).

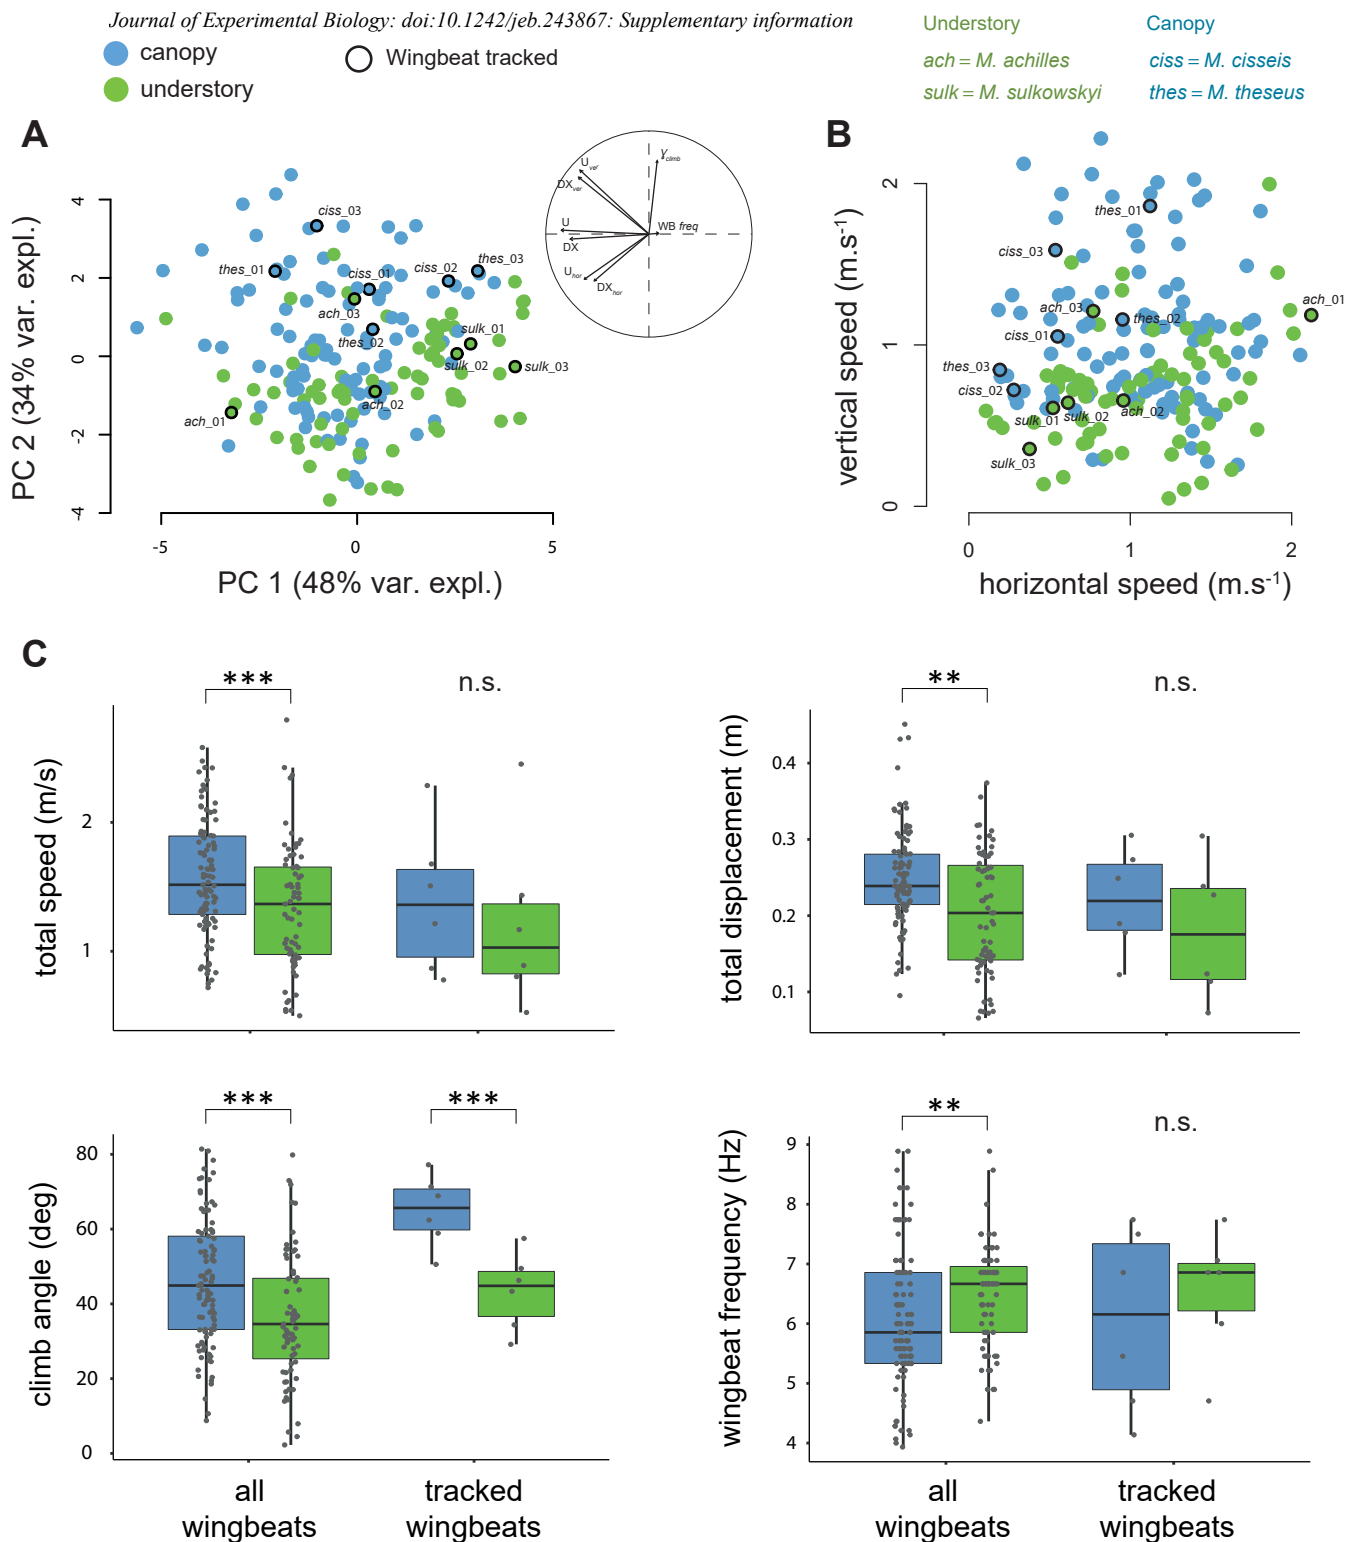

**Fig. S3. Comparison of climbing performance between the full and the sub-dataset.**

(A-B) Wingbeats for which detailed wing and body movement was quantified (see Fig. 2) are highlighted with black circles (sub-dataset). Only the position of the body centre was tracked for the other wingbeats (full dataset) (see Fig. 1C). The tracked wingbeats are shown on Principal Component Analysis performed on the set of 8 flight parameters (A) and on a plot of vertical vs. horizontal speed (B). Panel C shows comparisons between the full and the sub-dataset for the different climbing performance metrics. One point is one wingbeat. The full dataset include 4 flights from 2 canopy species (totalizing 106 wingbeats), and 31 flights from 5 understory species (totalizing 77 wingbeats). The sub-dataset includes 2 canopy and 2 understory species, in which three wingbeats were digitized for each species, each taken from a different individual. In C, statistical difference between canopy and understory were tested using ANOVAs (\*\* $p < 0.01$ ; \*\*\* $p < 0.001$ ; n.s. = not significant).

**Table S1.** Results of phylogenetic ANOVAs testing the effect of microhabitat on climbing and wingbeat kinematic parameters. Tests performed on mean values per species ( $N_{\text{canopy}} = 2$ ;  $N_{\text{understory}} = 5$ ).

| Climbing<br>kinematic parameters | Effect of microhabitat<br>(phylogenetic ANOVA) |          |
|----------------------------------|------------------------------------------------|----------|
|                                  | <i>F</i>                                       | <i>P</i> |
| Vertical displacement            | 3.21                                           | 0.133    |
| Horizontal displacement          | 0.02                                           | 0.869    |
| Vertical velocity                | 1.55                                           | 0.267    |
| Horizontal velocity              | 0.01                                           | 0.917    |
| Total velocity                   | 0.12                                           | 0.734    |
| Climb angle                      | 1.44                                           | 0.283    |
| Wingbeat frequency (Hz)          | 0.14                                           | 0.721    |

**Table S2.** Results of ANOVAs testing the effect of microhabitat and species on the wing and body kinematics parameters. ( $N_{\text{canopy species}} = 2$ ;  $N_{\text{understory species}} = 2$ ;  $N_{\text{wingbeat}} = 3$  per species, each wingbeat taken from a different individual)

| Parameters                       | Mean value $\pm$ sd |                   | Microhabitat |              | Species  |          |
|----------------------------------|---------------------|-------------------|--------------|--------------|----------|----------|
|                                  | <i>canopy</i>       | <i>understory</i> | <i>F</i>     | <i>P</i>     | <i>F</i> | <i>P</i> |
| Wing speed (m.s. <sup>-1</sup> ) | 1.27 $\pm$ 0.41     | 1.15 $\pm$ 0.53   | 0.19         | 0.671        | 1.51     | 0.277    |
| Stroke amplitude (deg)           | 66.4 $\pm$ 1.7      | 63.9 $\pm$ 5.7    | 0.89         | 0.372        | 0.49     | 0.624    |
| Forewing AoA (deg)               | 66.4 $\pm$ 1.7      | 63.9 $\pm$ 5.7    | 0.91         | 0.367        | 0.15     | 0.858    |
| Hindwing AoA (deg)               | 51.6 $\pm$ 10.9     | 56.3 $\pm$ 7.6    | 1.21         | 0.302        | 3.91     | 0.065    |
| Body pitch angle (deg)           | 66.6 $\pm$ 8.7      | 43.7 $\pm$ 9.8    | 17.88        | <b>0.002</b> | 0.91     | 0.441    |
